# Supplementary material for: Advantage of Vital Sign Monitoring Using a Wireless Wearable Device for Predicting Septic Shock in Febrile Patients in the Emergency Department: A Machine Learning-Based Analysis
Source: MDPI journal article supplement (doi:10.3390/s22187054), 2022-09-17
Supplement: s1 [file s1]

Supplementary table S1. The structure of the models

|                                        | Description              | Model Structure                            | Hidden Layer Size      | Epochs | Slice Length (sec) | AUROC |
|----------------------------------------|--------------------------|--------------------------------------------|------------------------|--------|--------------------|-------|
| <b>Fragmented model (Manual Data)</b>  | Final Model              | Dense + Batchnorm + l-relu +Dropout        | 512                    | 400    |                    | 0.841 |
|                                        | No Dropout               | Dense + Batchnorm + l-relu                 | 512                    | 400    |                    | 0.822 |
|                                        | Hidden-Size=256          | Dense + Batchnorm + l-relu +Dropout        | 256                    | 400    |                    | 0.815 |
|                                        | Hidden-Size=128          | Dense + Batchnorm + l-relu +Dropout        | 128                    | 400    |                    | 0.778 |
|                                        | Epoch 100                | Dense + Batchnorm + l-relu +Dropout        | 512                    | 100    |                    | 0.806 |
|                                        | Epoch 200                | Dense + Batchnorm + l-relu +Dropout        | 512                    | 200    |                    | 0.808 |
| <b>Fragmented model (Device Data)</b>  | Final Model              | Dense + Batchnorm + l-relu +Dropout        | 512                    | 400    | 600                | 0.858 |
|                                        | No Dropout               | Dense + Batchnorm + l-relu                 | 512                    | 400    | 600                | 0.832 |
|                                        | Hidden-Size=256          | Dense + Batchnorm + l-relu +Dropout        | 256                    | 400    | 600                | 0.827 |
|                                        | Hidden-Size=128          | Dense + Batchnorm + l-relu +Dropout        | 128                    | 400    | 600                | 0.785 |
|                                        | Model with shorter Slice | Dense + Batchnorm + l-relu +Dropout        | 512                    | 400    | 300                | 0.839 |
|                                        | Epoch 200                | Dense + Batchnorm + l-relu +Dropout        | 512                    | 200    | 600                | 0.848 |
| <b>Accumulated model (Manual Data)</b> | Final Model              | LSTM + Dense + Batchnorm + l-relu +Dropout | Dense: 512 / LSTM: 128 | 400    |                    | 0.853 |
|                                        | No Dropout               | LSTM + Dense + Batchnorm + l-relu          | Dense: 512 / LSTM: 128 | 400    |                    | 0.818 |
|                                        | Hidden-Size=256          | LSTM + Dense + Batchnorm + l-relu +Dropout | Dense: 256 / LSTM: 128 | 400    |                    | 0.82  |
|                                        | Epoch 150                | LSTM + Dense + Batchnorm + l-relu +Dropout | Dense: 512 / LSTM: 128 | 150    |                    | 0.833 |
|                                        | Epoch 200                | LSTM + Dense + Batchnorm + l-relu +Dropout | Dense: 512 / LSTM: 128 | 200    |                    | 0.838 |
| <b>Accumulated model (Device Data)</b> | Final Model              | LSTM + Dense + Batchnorm + l-relu +Dropout | Dense: 512 / LSTM: 128 | 400    | 600                | 0.861 |
|                                        | No Dropout               | LSTM + Dense + Batchnorm + l-relu          | Dense: 512 / LSTM: 128 | 400    | 600                | 0.845 |
|                                        | Hidden-Size=256          | LSTM + Dense + Batchnorm + l-relu +Dropout | Dense: 256 / LSTM: 128 | 400    | 600                | 0.784 |
|                                        | Model with shorter Slice | LSTM + Dense + Batchnorm + l-relu +Dropout | Dense: 512 / LSTM: 128 | 400    | 300                | 0.809 |
|                                        | Epoch 200                | LSTM + Dense + Batchnorm + l-relu +Dropout | Dense: 512 / LSTM: 128 | 200    | 600                | 0.85  |

AUROC, Area under the receiver operating characteristic curve; LSTM, Long short-term memory
