# Supplementary figures and images for: Advantage of Vital Sign Monitoring Using a Wireless Wearable Device for Predicting Septic Shock in Febrile Patients in the Emergency Department: A Machine Learning-Based Analysis
Source: MDPI journal article supplement (doi:10.3390/s22187054), 2022-09-17

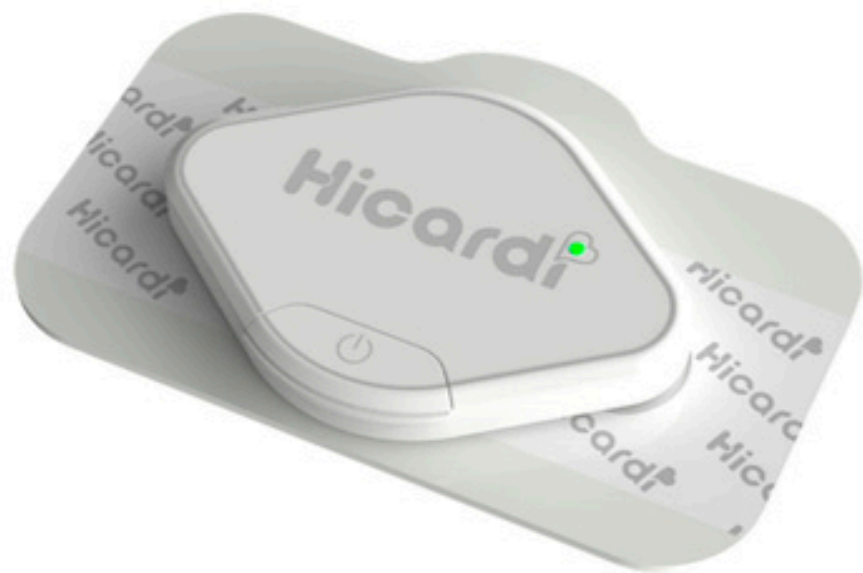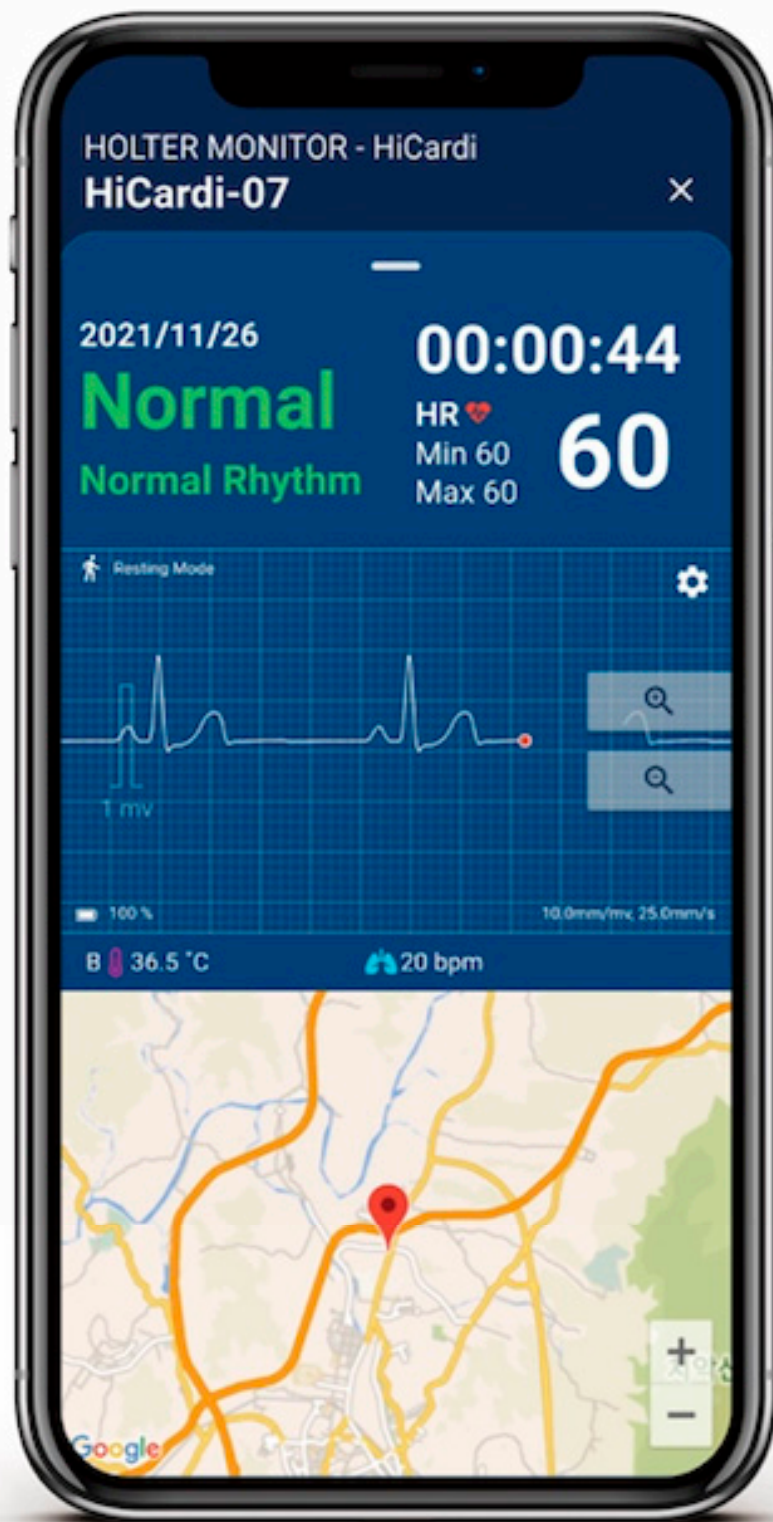

Supplement: s1 [file s1]

**(a)**

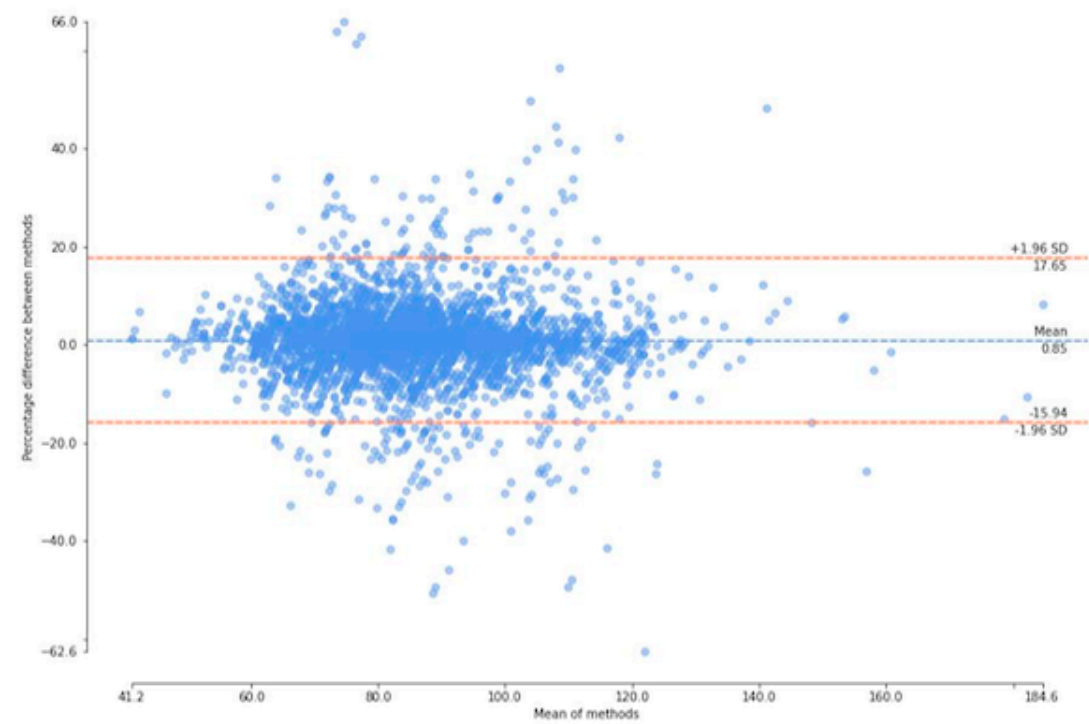

**(b)**

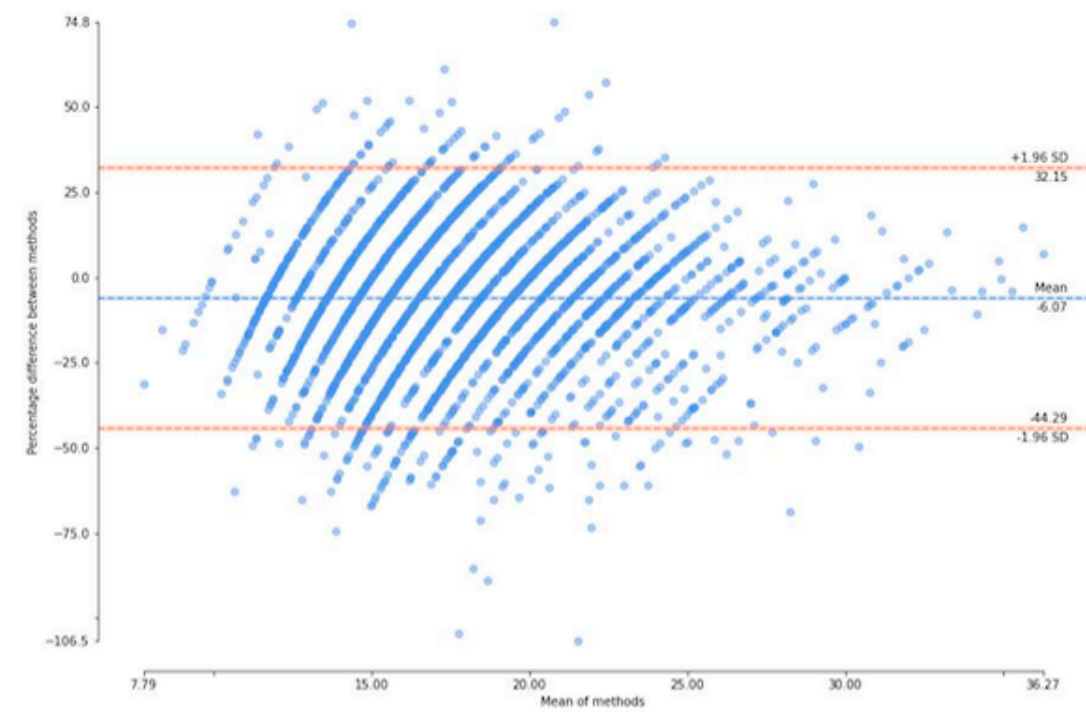

Supplement: s1 [file s1]
